# Supplementary material for: The collapse of the Cordilleran–Laurentide ice saddle and early opening of the Mackenzie Valley, Northwest Territories, Canada, constrained by 10 Be exposure dating
Source: Copernicus journal article supplement (doi:10.5194/tc-16-4865-2022), 2022-12-06
Supplement: Supplementary file 1 [file CRONUS input.xlsx]

## Sheet: Modern day elevation
Field ID (txt)	Latitude (d.d)	Longitude (d.d)	Elevation (m)	Alt tag (std)	Thickness (cm)	Density (g/cm3)	Shielding (unitless)	Erosion Rate (cm/a)	Date of sample collection	Line End Semicolon	Sample Name	Nuclide-mineral pair	Nuclide-mineral pair	Nuclide concentration	Uncertainty	Be-10 standardization	Line end semicolon
NW-18-07	65.2435	-126.108	943	std	2	2.6	0.986843	0	2018	;	NW-18-07	Be-10	quartz	140326	2984.15	07KNSTD	;
NW-18-09	65.2456	-126.105	924	std	2	2.6	0.986843	0	2018	;	NW-18-09	Be-10	quartz	139217	3025.72	07KNSTD	;
NW-18-10	64.9867	-127.59	1048	std	1	2.6	0.985897	0	2018	;	NW-18-10	Be-10	quartz	196286	4143.74	07KNSTD	;
NW-18-11	64.9903	-127.583	1075	std	4	2.6	0.986843	0	2018	;	NW-18-11	Be-10	quartz	187786	4043.19	07KNSTD	;
NW-18-12	64.9904	-127.574	1071	std	2	2.6	0.986843	0	2018	;	NW-18-12	Be-10	quartz	191415	4091.62	07KNSTD	;
NW-18-15	63.8555	-126.871	1394	std	1.5	2.6	0.985858	0	2018	;	NW-18-15	Be-10	quartz	491939	10578.5	07KNSTD	;
NW-18-16	63.8556	-126.869	1385	std	1.5	2.6	0.985858	0	2018	;	NW-18-16	Be-10	quartz	1.49812e+06	28314.1	07KNSTD	;
NW-18-17	63.8569	-126.866	1374	std	2.5	2.6	0.986398	0	2018	;	NW-18-17	Be-10	quartz	368693	7270.51	07KNSTD	;
NW-18-18	63.8567	-126.86	1374	std	1.5	2.6	0.986382	0	2018	;	NW-18-18	Be-10	quartz	3.71845e+06	51704	07KNSTD	;
NW-18-19	65.185	-126.296	192	std	5	2.6	0.986843	0	2018	;	NW-18-19	Be-10	quartz	65305	1595.18	07KNSTD	;
NW-18-20	65.1864	-126.299	203	std	1.5	2.6	0.986843	0	2018	;	NW-18-20	Be-10	quartz	77244.9	1883.13	07KNSTD	;
NW-18-21	65.1866	-126.299	207	std	2	2.6	0.986843	0	2018	;	NW-18-21	Be-10	quartz	100955	2139.58	07KNSTD	;
NW-18-22	65.1865	-126.299	204	std	1.5	2.6	0.986843	0	2018	;	NW-18-22	Be-10	quartz	67718.2	1654.36	07KNSTD	;
NWT-MM_15-01	63.3988	-123.186	1436	std	4	2.7	1	0	2015	;	NWT-MM_15-01	Be-10	quartz	301772	8924.64	07KNSTD	;
NWT-MM-15-02	63.4014	-123.19	1479	std	3	2.7	1	0	2015	;	NWT-MM-15-02	Be-10	quartz	283873	7773.25	07KNSTD	;
NWT-MM-15-03	63.4014	-123.19	1479	std	2.5	2.7	1	0	2015	;	NWT-MM-15-03	Be-10	quartz	252803	8164.93	07KNSTD	;
NWT-MM-15-04	63.4008	-123.189	1468	std	2.5	2.7	1	0	2015	;	NWT-MM-15-04	Be-10	quartz	238019	7582.24	07KNSTD	;
NWT-MM-15-05	63.3997	-123.186	1447	std	2.5	2.7	1	0	2015	;	NWT-MM-15-05	Be-10	quartz	223885	5944.01	07KNSTD	;
NWT-MM-15-06	63.3974	-123.183	1419	std	2.5	2.7	1	0	2015	;	NWT-MM-15-06	Be-10	quartz	233905	6410.36	07KNSTD	;
NWT-MM-15-07	63.3944	-123.178	1358	std	2	2.7	1	0	2015	;	NWT-MM-15-07	Be-10	quartz	215477	5879.91	07KNSTD	;
NWT-MM-15-08	63.3885	-123.17	1279	std	1.5	2.7	1	0	2015	;	NWT-MM-15-08	Be-10	quartz	250428	6860.61	07KNSTD	;
NWT-MM-15-09	63.3948	-123.133	832	std	2.5	2.7	1	0	2015	;	NWT-MM-15-09	Be-10	quartz	138379	6144.27	07KNSTD	;
NWT-MM-15-10	63.3943	-123.132	814	std	1.5	2.7	1	0	2015	;	NWT-MM-15-10	Be-10	quartz	146449	4702.57	07KNSTD	;
NWT-MM-15-11	63.2114	-123.138	987	std	2.75	2.7	1	0	2015	;	NWT-MM-15-11	Be-10	quartz	162341	4528.97	07KNSTD	;
NWT-MM-15-12	63.2106	-123.138	985	std	2	2.7	1	0	2015	;	NWT-MM-15-12	Be-10	quartz	143679	4053.6	07KNSTD	;
NWT-MM-15-13	63.0629	-122.991	854	std	3	2.7	1	0	2015	;	NWT-MM-15-13	Be-10	quartz	134680	3675.35	07KNSTD	;
NWT-MM-15-14	63.0611	-122.991	847	std	3	2.7	1	0	2015	;	NWT-MM-15-14	Be-10	quartz	129497	3534	07KNSTD	;
JR16-224	65.2703	-113.27	400	std	2	2.65	1	0	2016	;	JR16-224	Be-10	quartz	71323	2755	07KNSTD	;
AVR16-05	65.1049	-115.719	470	std	2	2.65	1	0	2016	;	AVR16-05	Be-10	quartz	80022	2940	07KNSTD	;
AVR16-06	65.1044	-115.719	470	std	2	2.65	1	0	2016	;	AVR16-06	Be-10	quartz	78565	3627	07KNSTD	;
AVR16-07	65.1044	-115.718	470	std	2	2.65	1	0	2016	;	AVR16-07	Be-10	quartz	81852	3660	07KNSTD	;
AVR16-08	65.1044	-115.718	470	std	2	2.65	1	0	2016	;	AVR16-08	Be-10	quartz	78799	2521	07KNSTD	;
AVR16-09	65.104	-115.718	470	std	2	2.65	1	0	2016	;	AVR16-09	Be-10	quartz	80852	3728	07KNSTD	;
JR16-225	65.2703	-113.27	400	std	2	2.65	1	0	2016	;	JR16-225	Be-10	quartz	67875	2532	07KNSTD	;
JR16-226	65.2695	-113.272	400	std	2	2.65	1	0	2016	;	JR16-226	Be-10	quartz	42854	12908	07KNSTD	;
JR16-227	65.2711	-113.272	400	std	2	2.65	1	0	2016	;	JR16-227	Be-10	quartz	67600	3453	07KNSTD	;
JR16-228	65.2719	-113.274	400	std	2	2.65	1	0	2016	;	JR16-228	Be-10	quartz	65467	3033	07KNSTD	;
JR16-229	65.272	-113.273	400	std	2	2.65	1	0	2016	;	JR16-229	Be-10	quartz	67393	1595	07KNSTD	;
AVR16-04	65.1049	-115.72	470	std	2	2.65	1	0	2016	;	AVR16-04	Be-10	quartz	83213	3026	07KNSTD	;

## Sheet: GIA corrected elevation
Field ID (txt)	Latitude (d.d)	Longitude (d.d)	Elevation (m)	Alt tag (std)	Thickness (cm)	Density (g/cm3)	Shielding (unitless)	Erosion Rate (cm/a)	Date of sample collection	Line End Semicolon	Sample Name	Nuclide-mineral pair	Nuclide-mineral pair	Nuclide concentration	Uncertainty	Be-10 standardization	Line end semicolon
NW-18-07	65.2435	-126.108	932.242	std	2	2.6	0.986843	0	2018	;	NW-18-07	Be-10	quartz	140326	2984.15	07KNSTD	;
NW-18-09	65.2456	-126.105	913.242	std	2	2.6	0.986843	0	2018	;	NW-18-09	Be-10	quartz	139217	3025.72	07KNSTD	;
NW-18-10	64.9867	-127.59	1046.87	std	1	2.6	0.985897	0	2018	;	NW-18-10	Be-10	quartz	196286	4143.74	07KNSTD	;
NW-18-11	64.9903	-127.583	1073.87	std	4	2.6	0.986843	0	2018	;	NW-18-11	Be-10	quartz	187786	4043.19	07KNSTD	;
NW-18-12	64.9904	-127.574	1069.87	std	2	2.6	0.986843	0	2018	;	NW-18-12	Be-10	quartz	191415	4091.62	07KNSTD	;
NW-18-15	63.8555	-126.871	1394	std	1.5	2.6	0.985858	0	2018	;	NW-18-15	Be-10	quartz	491939	10578.5	07KNSTD	;
NW-18-16	63.8556	-126.869	1385	std	1.5	2.6	0.985858	0	2018	;	NW-18-16	Be-10	quartz	1.49812e+06	28314.1	07KNSTD	;
NW-18-17	63.8569	-126.866	1374	std	2.5	2.6	0.986398	0	2018	;	NW-18-17	Be-10	quartz	368693	7270.51	07KNSTD	;
NW-18-18	63.8567	-126.86	1374	std	1.5	2.6	0.986382	0	2018	;	NW-18-18	Be-10	quartz	3.71845e+06	51704	07KNSTD	;
NW-18-19	65.185	-126.296	181.242	std	5	2.6	0.986843	0	2018	;	NW-18-19	Be-10	quartz	65305	1595.18	07KNSTD	;
NW-18-20	65.1864	-126.299	192.242	std	1.5	2.6	0.986843	0	2018	;	NW-18-20	Be-10	quartz	77244.9	1883.13	07KNSTD	;
NW-18-21	65.1866	-126.299	196.242	std	2	2.6	0.986843	0	2018	;	NW-18-21	Be-10	quartz	100955	2139.58	07KNSTD	;
NW-18-22	65.1865	-126.299	193.242	std	1.5	2.6	0.986843	0	2018	;	NW-18-22	Be-10	quartz	67718.2	1654.36	07KNSTD	;
NWT-MM_15-01	63.3988	-123.186	1402.85	std	4	2.7	1	0	2015	;	NWT-MM_15-01	Be-10	quartz	301772	8924.64	07KNSTD	;
NWT-MM-15-02	63.4014	-123.19	1445.85	std	3	2.7	1	0	2015	;	NWT-MM-15-02	Be-10	quartz	283873	7773.25	07KNSTD	;
NWT-MM-15-03	63.4014	-123.19	1445.85	std	2.5	2.7	1	0	2015	;	NWT-MM-15-03	Be-10	quartz	252803	8164.93	07KNSTD	;
NWT-MM-15-04	63.4008	-123.189	1434.85	std	2.5	2.7	1	0	2015	;	NWT-MM-15-04	Be-10	quartz	238019	7582.24	07KNSTD	;
NWT-MM-15-05	63.3997	-123.186	1413.85	std	2.5	2.7	1	0	2015	;	NWT-MM-15-05	Be-10	quartz	223885	5944.01	07KNSTD	;
NWT-MM-15-06	63.3974	-123.183	1385.85	std	2.5	2.7	1	0	2015	;	NWT-MM-15-06	Be-10	quartz	233905	6410.36	07KNSTD	;
NWT-MM-15-07	63.3944	-123.178	1324.85	std	2	2.7	1	0	2015	;	NWT-MM-15-07	Be-10	quartz	215477	5879.91	07KNSTD	;
NWT-MM-15-08	63.3885	-123.17	1245.85	std	1.5	2.7	1	0	2015	;	NWT-MM-15-08	Be-10	quartz	250428	6860.61	07KNSTD	;
NWT-MM-15-09	63.3948	-123.133	798.847	std	2.5	2.7	1	0	2015	;	NWT-MM-15-09	Be-10	quartz	138379	6144.27	07KNSTD	;
NWT-MM-15-10	63.3943	-123.132	780.847	std	1.5	2.7	1	0	2015	;	NWT-MM-15-10	Be-10	quartz	146449	4702.57	07KNSTD	;
NWT-MM-15-11	63.2114	-123.138	953.847	std	2.75	2.7	1	0	2015	;	NWT-MM-15-11	Be-10	quartz	162341	4528.97	07KNSTD	;
NWT-MM-15-12	63.2106	-123.138	951.847	std	2	2.7	1	0	2015	;	NWT-MM-15-12	Be-10	quartz	143679	4053.6	07KNSTD	;
NWT-MM-15-13	63.0629	-122.991	818.282	std	3	2.7	1	0	2015	;	NWT-MM-15-13	Be-10	quartz	134680	3675.35	07KNSTD	;
NWT-MM-15-14	63.0611	-122.991	811.282	std	3	2.7	1	0	2015	;	NWT-MM-15-14	Be-10	quartz	129497	3534	07KNSTD	;
JR16-224	65.2703	-113.27	337.616	std	2	2.65	1	0	2016	;	JR16-224	Be-10	quartz	71323	2755	07KNSTD	;
AVR16-05	65.1049	-115.719	393.367	std	2	2.65	1	0	2016	;	AVR16-05	Be-10	quartz	80022	2940	07KNSTD	;
AVR16-06	65.1044	-115.719	393.367	std	2	2.65	1	0	2016	;	AVR16-06	Be-10	quartz	78565	3627	07KNSTD	;
AVR16-07	65.1044	-115.718	393.367	std	2	2.65	1	0	2016	;	AVR16-07	Be-10	quartz	81852	3660	07KNSTD	;
AVR16-08	65.1044	-115.718	393.367	std	2	2.65	1	0	2016	;	AVR16-08	Be-10	quartz	78799	2521	07KNSTD	;
AVR16-09	65.104	-115.718	393.367	std	2	2.65	1	0	2016	;	AVR16-09	Be-10	quartz	80852	3728	07KNSTD	;
JR16-225	65.2703	-113.27	337.616	std	2	2.65	1	0	2016	;	JR16-225	Be-10	quartz	67875	2532	07KNSTD	;
JR16-226	65.2695	-113.272	337.616	std	2	2.65	1	0	2016	;	JR16-226	Be-10	quartz	42854	12908	07KNSTD	;
JR16-227	65.2711	-113.272	337.616	std	2	2.65	1	0	2016	;	JR16-227	Be-10	quartz	67600	3453	07KNSTD	;
JR16-228	65.2719	-113.274	337.616	std	2	2.65	1	0	2016	;	JR16-228	Be-10	quartz	65467	3033	07KNSTD	;
JR16-229	65.272	-113.273	337.616	std	2	2.65	1	0	2016	;	JR16-229	Be-10	quartz	67393	1595	07KNSTD	;
AVR16-04	65.1049	-115.72	393.367	std	2	2.65	1	0	2016	;	AVR16-04	Be-10	quartz	83213	3026	07KNSTD	;
