# Supplementary material for: The collapse of the Cordilleran–Laurentide ice saddle and early opening of the Mackenzie Valley, Northwest Territories, Canada, constrained by 10 Be exposure dating
Source: Copernicus journal article supplement (doi:10.5194/tc-16-4865-2022), 2022-12-06
Supplement: Supplementary file 1 [file tc-16-4865-2022-supplement.zip]

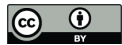

## *Supplement of*

# **The collapse of the Cordilleran–Laurentide ice saddle and early opening of the Mackenzie Valley, Northwest Territories, Canada, constrained by $^{10}\text{Be}$ exposure dating**

**Benjamin J. Stoker et al.**

*Correspondence to:* Benjamin J. Stoker (stokerb@natur.cuni.cz), Martin Margold (margold@natur.cuni.cz), and Duane Froese (duane@ualberta.ca)

- tc-16-4865-2022-supplement-title-page.pdf
- Supplement
  - CRONUS input.xlsx
  - Supplementary Document 1 – Ice margin changes justification.docx
  - Supplementary figures – The deglaciation of the Mackenzie Valley.docx
  - tabs01.docx
  - tabs02.xlsx
  - tabs03,s04,s05,s06.xlsx

The copyright of individual parts of the supplement might differ from the article licence.
