# Supplementary material for: The collapse of the Cordilleran–Laurentide ice saddle and early opening of the Mackenzie Valley, Northwest Territories, Canada, constrained by 10 Be exposure dating
Source: Copernicus journal article supplement (doi:10.5194/tc-16-4865-2022), 2022-12-06
Supplement: Supplementary file 4 [file tabs01.docx]

Supplementary table 1. Sensitivity analysis results comparing the impact of different GIA models on cosmogenic nuclide exposure age calculation. All ages were calculated used the ExPage script and integrated GIA correction within Octave.

**Standard refers to ages calculated using the default exposure age calculation method of the ExPage calculator. This calculation includes no corrections.*

| Sample number | Standard* | Peltier et al (2015) | Lambeck et al (2017) | Gowan (2021) | Peltier difference | Lambeck difference | Gowan difference |
| --- | --- | --- | --- | --- | --- | --- | --- |
| NW-18-07 | 13760 | 14423 | 13860 | 13237 | -663 | -100 | 523 |
| NW-18-09 | 13889 | 14609 | 14003 | 13359 | -720 | -114 | 530 |
| NW-18-19 | 13307 | 13822 | 13371 | 12781 | -515 | -64 | 526 |
| NW-18-20 | 15139 | 16440 | 15450 | 14538 | -1301 | -311 | 601 |
| NW-18-21 | 19840 | 23223 | 20812 | 19120 | -3383 | -972 | 720 |
| NW-18-22 | 13243 | 13737 | 13302 | 12720 | -494 | -59 | 523 |
| NW-18-10 | 17448 | 19233 | 17776 | 16834 | -1785 | -328 | 614 |
| NW-18-11 | 16693 | 18096 | 16944 | 16099 | -1403 | -251 | 594 |
| NW-18-12 | 16791 | 18248 | 17054 | 16195 | -1457 | -263 | 596 |
| NW-18-15 | 32868 | 36264 | 34041 | 31555 | -3396 | -1173 | 1313 |
| NW-18-16 | 102815 | 105800 | 103500 | 97682 | -2985 | -685 | 5133 |
| NW-18-17 | 25187 | 28623 | 26417 | 24580 | -3436 | -1230 | 607 |
| NW-18-18 | 268292 | 270230 | 267760 | 261429 | -1938 | -532 | 6863 |
| NWT-MM_15-01 | 19454 | 24047 | 21064 | 19794 | -4593 | -1610 | -340 |
| NWT-MM-15-02 | 17473 | 20851 | 18710 | 17721 | -3378 | -1237 | -248 |
| NWT-MM-15-03 | 15475 | 17683 | 16278 | 15558 | -2208 | -803 | -83 |
| NWT-MM-15-04 | 14700 | 16449 | 15318 | 14711 | -1749 | -618 | -11 |
| NWT-MM-15-05 | 14070 | 15447 | 14537 | 14028 | -1377 | -467 | 42 |
| NWT-MM-15-06 | 15064 | 17052 | 15776 | 15112 | -1988 | -712 | -48 |
| NWT-MM-15-07 | 14553 | 16250 | 15147 | 14555 | -1697 | -594 | -2 |
| NWT-MM-15-08 | 18063 | 21929 | 19455 | 18366 | -3866 | -1392 | -303 |
| NWT-MM-15-09 | 14959 | 17108 | 15717 | 15013 | -2149 | -758 | -54 |
| NWT-MM-15-10 | 15961 | 18773 | 16982 | 16117 | -2812 | -1021 | -156 |
| NWT-MM-15-11 | 15299 | 17596 | 16109 | 15433 | -2297 | -810 | -134 |
| NWT-MM-15-12 | 13460 | 14567 | 13822 | 13413 | -1107 | -362 | 47 |
| NWT-MM-15-13 | 14338 | 16105 | 14926 | 14418 | -1767 | -588 | -80 |
| NWT-MM-15-14 | 13870 | 15315 | 14334 | 13900 | -1445 | -464 | -30 |

References:

Gowan, E.J., Zhang, X., Khosravi, S., Rovere, A., Stocchi, P., Hughes, A.L., Gyllencreutz, R., Mangerud, J., Svendsen, J.I. and Lohmann, G., 2021. A new global ice sheet reconstruction for the past 80 000 years. *Nature communications*, *12*(1), pp.1-9

Lambeck, K., Purcell, A. and Zhao, S., 2017. The North American Late Wisconsin ice sheet and mantle viscosity from glacial rebound analyses. *Quaternary Science Reviews*, *158*, pp.172-210

Peltier, W.R., Argus, D.F. and Drummond, R., 2015. Space geodesy constrains ice age terminal deglaciation: The global ICE‐6G_C (VM5a) model. *Journal of Geophysical Research: Solid Earth*, *120*(1), pp.450-487
